# Supplementary material for: Construction of hierarchical CoP@Ni2P core–shell nanoarrays for efficient electrocatalytic hydrogen evolution in alkaline solution
Source: Royal Society of Chemistry journal article supplement (doi:10.1039/d1ra03377h), 2021-01-01
Supplement: d1ra03377h1.pdf [file d1ra03377h1.pdf]

## Supporting Information

### Construction of Hierarchical CoP@Ni<sub>2</sub>P Nanoarrays for Efficient Electrocatalytic Hydrogen Evolution in Alkaline Solution

Hao Jin<sup>a</sup>, Shuo Liu,<sup>a</sup> Lang Pei,<sup>\*a</sup> Gao Li,<sup>b</sup> Zhanfeng Ma,<sup>a</sup> Wangfeng Bai,<sup>a</sup> Shiting Wu,<sup>a</sup> Yong-Jun Yuan,<sup>\*a</sup> and Jiasong Zhong<sup>a</sup>

<sup>a</sup> College of Materials and Environmental Engineering, Hangzhou Dianzi University, Hangzhou 310018, P. R. China.

<sup>b</sup> College of Electronics and Information, Hangzhou Dianzi University, Hangzhou 310018, P. R. China.

\*Email - peilang@hdu.edu.cn; yjyuan@hdu.edu.cn

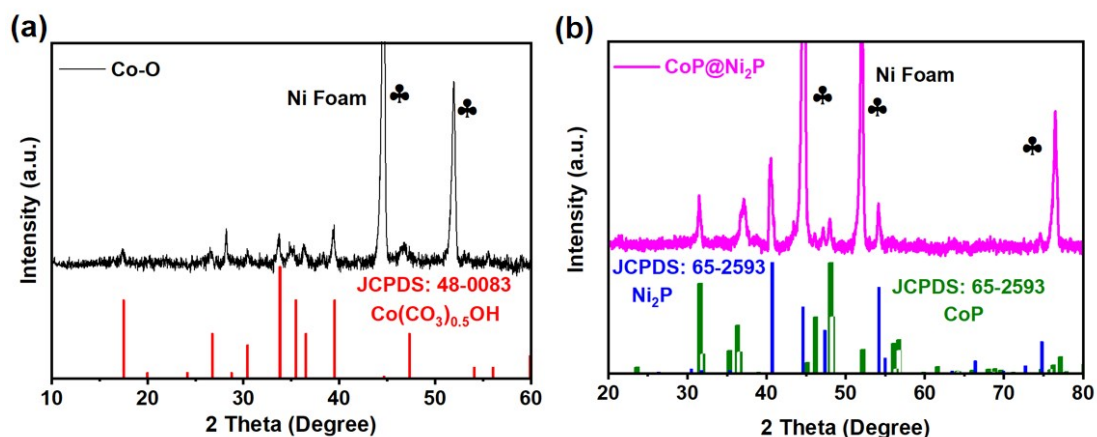

Fig. S1. XRD patterns of (a) Co-O nanowires and (b) CoP@Ni<sub>2</sub>P, respectively.

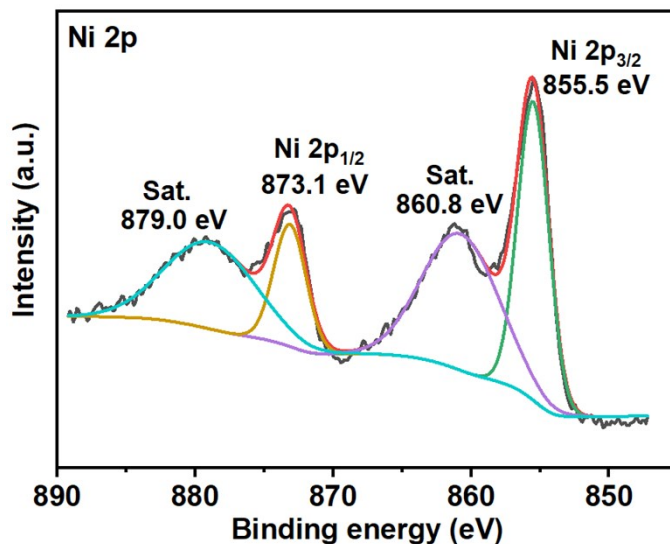

Fig. S2. XPS spectra of Ni 2p for Ni<sub>2</sub>P.

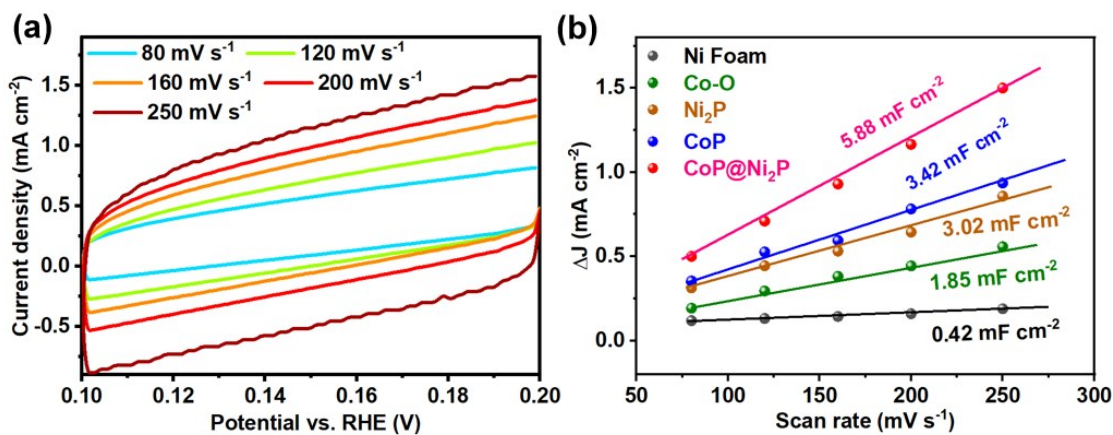

Fig. S3. (a) Typical cyclic voltammogram shows the capacitive current for the Ni<sub>2</sub>P@CoP

at five different scan rates from 80 to 250 mV/s. (b) Plots show the the linear relationship between the capacitive current and scan rate for various catalysts.

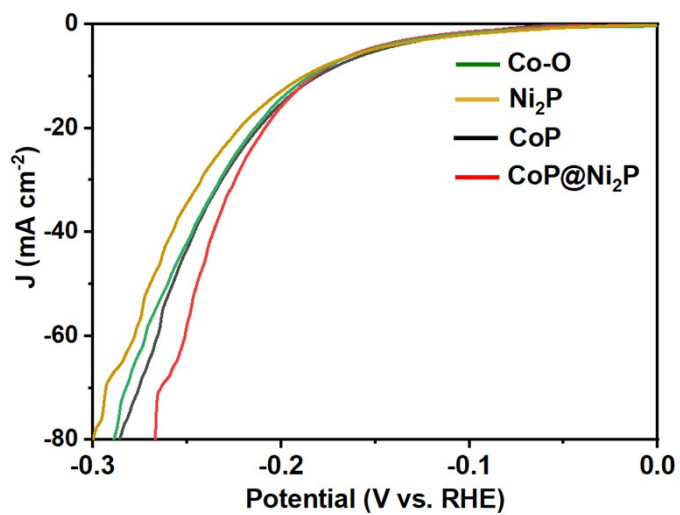

**Fig. S4.** LSV curves of obtained samples for HER in 1.0 M KOH with the current density normalized by their ECSA.

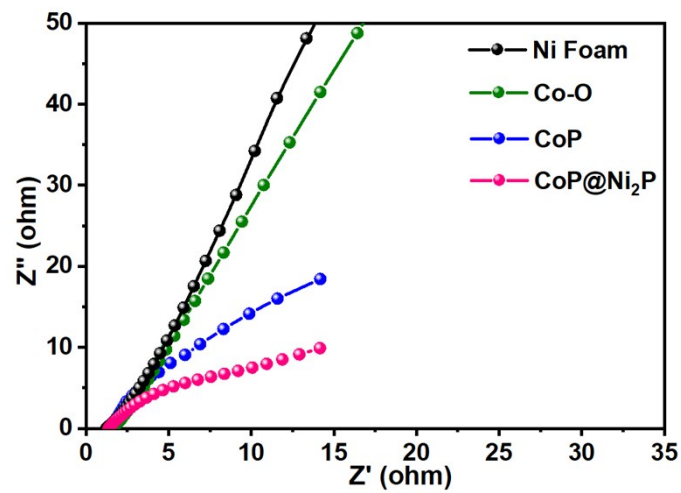

**Fig. S5.** Nyquist plots of CoP@Ni<sub>2</sub>P and control catalysts at a constant potential of -0.15 V versus RHE.

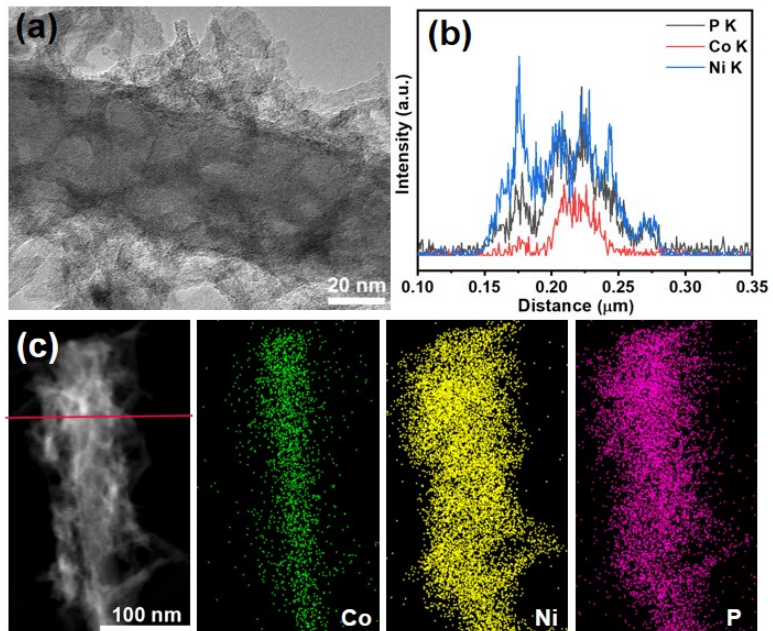

**Fig. S6.** (a) TEM image, (b) EDX line scanning spectra, and (c) elemental mapping images of CoP@Ni<sub>2</sub>P after the durability test for 20 h in 1.0 M KOH. The EDX line scanning region is indicated by the red solid line in (c).

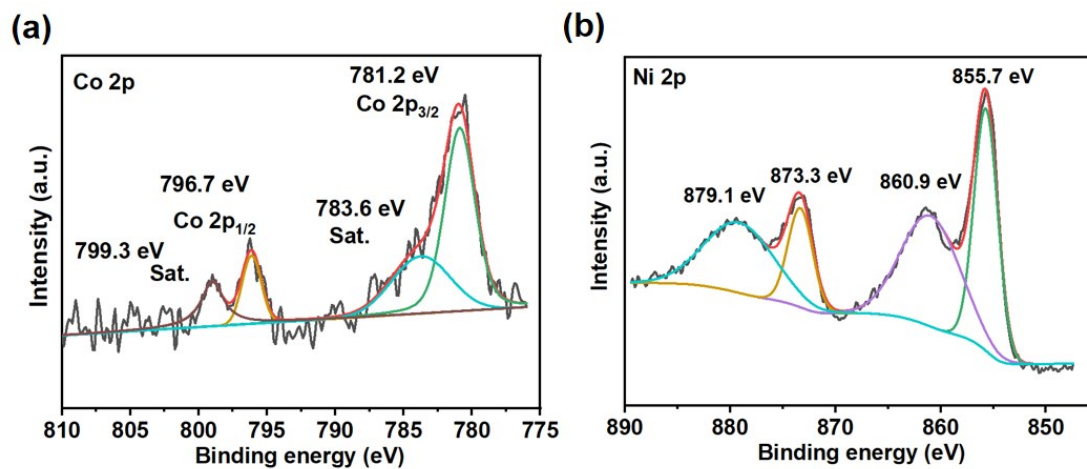

**Fig. S7.** The Co 2p and Ni 2p XPS spectrum of CoP@NiP after the durability test for 20 h in 1.0 M KOH.
